1 2006; Jia et al., 2009). In humans, PD impairs psychological and mental development, and  
2 increases the risk for substance abuse and personality disorders (Grossmann et al., 2002; Jablonska  
3 and Lindberg, 2007; Sobrinho et al., 2012). Despite emerging evidence of the impact of PD, the  
4 primary focus has been on father-offspring relationships from postnatal day (PND) 0–21 in  
5 rodents (Helmeke et al., 2009; Gos et al., 2014; Ahern and Young, 2009; Jia et al., 2011; Yu et al.,  
6 2015).

7 Mandarin voles (*Microtus mandarinus*) are furred by around PND 7, suggesting that their  
8 thermoregulatory ability is well developed. They open their eyes and begin to eat solid food  
9 around PND 13. Paternal care (e.g., licking, retrieving nest building) gradually declines from PND  
10 14–20 (Wang, unpublished data). Pups from PND 1–13 and 14–21 should have different needs  
11 and the effects of disruption of father-offspring bonds during the latter period may not be the result  
12 of disrupted direct care, but the result of disrupted emotional attachment (He et al., 2017). This  
13 species is socially monogamous and exhibits extensive biparental investment and high offspring  
14 survival and growth (Tai et al., 2001; Tai and Wang, 2001). Mandarin vole pups have high levels  
15 of attachment to their fathers from PND 14–21 (He et al., 2017). Mandarin voles are an ideal  
16 model to investigate the effects of disruption of father-pup attachment on the brain and behaviors  
17 at adulthood because paternal care and biparental rearing patterns are found only in a minority of  
18 mammalian species (Kleiman and Malcolm, 1981). Whether PD from PND 14–21 affects  
19 emotional and social behavior remains unexplored.

20 The neuropeptide oxytocin (OT) is produced primarily in neurons of the hypothalamic  
21 paraventricular nucleus (PVN) and supraoptic nucleus (SON) (Onaka, 2004). OT is strongly  
22 implicated in prosocial behavior (Marlin et al., 2015; Young and Wang, 2004; Burkett et al., 2016;  
23 Oettl et al., 2016; Ma et al., 2016; Wircer et al., 2017) and decreased anxiety-related behavior  
24 (Windle et al., 1997; Blume, 2008; Sabihi, 2014b). Previous studies have found that PD alters  
25 levels of OT receptor (OTR) mRNA expression in the brain (Cao et al., 2014), and neonatal  
26 OT-treatments have long-term effects on behavior and physiology in mandarin voles (Jia et al.,  
27 2009). OT binds to OTRs (Burkett et al., 2016) or vasopressin 1a receptors (V1aR) (Song et al.,  
28 2014) to affect social behavior. If pre-weaning PD changes social preference and emotion, we  
29 predict that it should also affect levels of OT and OTR.

30 OTRs and V1aRs are found in the medial prefrontal cortex (mPFC) (Smeltzer et al., 2006;  
31 Lieberwirth and Wang, 2016). Several studies suggest that the mPFC is critical for the expression  
32 of anxiety-like behavior (Shah and Treit, 2003; Lisboa et al., 2010; Saitoh et al., 2014; Wang et al.,  
33 2015) and social behavior (Sabihi et al., 2014a; Niu et al., 2017; Lee et al., 2016). This brain  
34 region is a heterogeneous cortical structure composed of subregions, including the anterior  
35 cingulate (Cg), prelimbic cortex (PLC) and infralimbic cortex (Heidbreder and Groenewegen,  
36 2003). Several studies have shown involvement of the PLC in the regulation of anxiety (Sabihi et  
37 al., 2014b; Wang et al., 2015) and social behavior (Young et al., 2001; Carrier and Kabbaj, 2012).  
38 A recent report found that a subset of mPFC neurons elevate discharge rates when approaching a  
39 strange mouse but not when approaching non-social objects (Lee et al., 2016) indicating  
40 involvement of the mPFC in social behavior. However, whether OT in the PLC is involved in the  
41 manifestations of pre-weaning deprivation on emotion and social preference remains unclear.

42 Using socially monogamous mandarin voles we investigated the effects of PD from PND 14–21  
43 on emotion and social preference, and levels of OT and OTR in specific brain regions. We then  
44 tested whether microinjection of OT into the mPFC can recover the effects of pre-weaning PD.

1 We hypothesized that disruption of early emotional attachment between pups and fathers affects  
2 anxiety-like behavior and social preference in mandarin voles at adulthood, and that the OT  
3 system is likely involved in this process.

4

## 5 **Results**

### 6 **Experiment 1: Effect of pre-weaning PD on anxiety-like behavior and social** 7 **preference**

8 It has previously been shown that offspring who experience neonatal maternal separation or early  
9 deprivation display high levels of anxiety-like behavior (Lee et al., 2007; Sachs et al., 2013; Wei et  
10 al., 2010; Koe et al., 2016; Rees et al., 2005). Neonatal adversity has been shown to induce  
11 changes in social behavior, including avoidance, fear and decreased social interaction (Giachino et  
12 al., 2007; Jia et al., 2009; Toth et al., 2013). Experiment 1 was designed to test the hypothesis that  
13 pre-weaning PD (PND 14–21) increases anxiety-like behavior and reduces social preference. At  
14 70 days of age, subjects were randomly divided into the control group (PC group: 7 females and 7  
15 males) and PD group (7 females and 7 males).

16 An open field test (OFT) showed that the percentage of time spent in the central area was  
17 greater in PC group compared with the PD group (male:  $t(12) = 4.158$ ,  $p < 0.01$ ; female:  $t(12) =$   
18  $3.226$ ,  $p < 0.05$ ). However, the total distance covered in the PC was not different from the PD  
19 group (Fig. 1).

20 Two-way ANOVA indicated a significant interaction between the percentage of investigation  
21 time in males for treatment x absence/presence of a stimulus mandarin vole interaction ( $F(1,24) =$   
22  $4.775$ ,  $p < 0.05$ ). The PC group engaged in more investigation of the social stimulus than object  
23 stimulus in males ( $p < 0.01$ ). Pre-weaning PD caused decreased social investigation in males  
24 during the social preference test ( $p < 0.01$ ). A main effect of absence/presence of a stimulus  
25 mandarin vole was found ( $F(1,24) = 11.785$ ,  $p < 0.01$ ), such that PC group females engaged in  
26 more investigation of the social stimulus than object stimulus ( $p < 0.01$ ). PD treatment did not  
27 produce a main effect ( $F(1,24) = 3.064$ ,  $P = 0.093$ ) in females. There was also no significant  
28 interaction in females ( $F(1,24) = 1.553$ ,  $P = 0.225$ ). PD did not affect investigation of the social  
29 stimulus and object stimulus in males or females (Fig. 1).

30

### 31 **Experiment 2: Effect of pre-weaning PD on mPFC and PVN OT-IR**

32 Previous studies have shown that neonatal isolation or maternal separation results in a decrease in  
33 OT-IR neurons in the PVN in male adult mandarin voles and female mice (Wei et al., 2013;  
34 Veenema et al., 2007). It is apparent that OT production in the hypothalamus is altered in response  
35 to social interactions in many species (Leng et al., 2008). Tactile stimulation at an early  
36 developmental stage induces immediate-early gene activity in OT neurons in prairie voles (Barrett  
37 et al., 2015) and rabbit pups (Caba et al., 2003), lower stress responses during their adulthood (Liu  
38 et al., 1997; Meaney et al., 2001), and alleviates the negative effects of neonatal isolation on novel  
39 object recognition and sociability (Wei et al., 2013). Oxytocinergic neurons within the PVN  
40 project to the mPFC (Uvnäs-Moberg et al., 2015) and the NAcc (Ross et al., 2009). We therefore  
41 tested levels of OT-IR in the NAcc, mPFC and PVN. Three hours after the social preference test,  
42 experimental mandarin voles from the PC ( $n = 4$  males, 4 females) and PD ( $n = 4$  males, 4 females)  
43 groups were anesthetized with pentobarbital sodium. Brains were removed from the skull and

1 placed in 4% paraformaldehyde three days. Brains were then dehydrated in 30% sucrose solution  
2 until saturated at 4 °C for immunohistochemistry.

3 Two-way ANOVA revealed interactions between treatment x sex for PVN OT-IR neurons ( $F(1,12)$   
4 = 8.265,  $p < 0.05$ ) and mPFC OT-IR fibers ( $F(1,12) = 17.621$ ,  $p < 0.01$ ). Post-hoc tests indicated  
5 that PD group males and females had fewer PVN OT-IR neurons than the PC group (both  $p < 0.01$ )  
6 (Fig. 2), and reduced mPFC OT-IR fibers than PC group males and females (both  $p < 0.01$ ) (Fig.  
7 3). Females possessed more PVN OT-IR neurons ( $p < 0.01$ ) and mPFC OT-IR fibers ( $p < 0.01$ )  
8 than males (Fig. 2, 3). NAcc OT-IR fibers did not differ between groups (Fig. 4).

### 10 **Experiment 3: Effect of pre-weaning PD on mPFC OTR-IR and V1aR-IR, serum** 11 **OT and corticosterone (CORT) concentration**

12 PD reduced OT-IR fibers in the PLC (Experiment 2). OT and arginine vasopressin (AVP), and  
13 OTR and V1aR, display a high degree of sequence homology and both peptides can activate both  
14 receptors (Chini and Manning, 2007). OTR (Li et al, 2016), V1aR and AVP (Dumais and Veenema,  
15 2016) are involved in regulation of mood and social behavior. Experiment 3 was designed to test  
16 the hypothesis that pre-weaning PD alters OTR, V1aR and/or AVP densities in the mPFC, NAcc  
17 and/or PVN. Voles from the PC ( $n = 4$  males, 4 females) and PD ( $n = 4$  males, 4 females) groups  
18 were sacrificed by rapid decapitation at 70 days of age. All brains were harvested, frozen on dry  
19 ice, and stored at -80 °C until Western blotting.

20 PD group males had lower levels of OTR ( $t(6) = 2.799$ ,  $p < 0.05$ ) and V1aR ( $t(6) = 2.816$ ,  $p <$   
21  $0.05$ ) proteins in the mPFC than PC group males. No group differences were noted for levels of  
22 male OTR and V1aR protein in the NAcc or PVN. PD group females had lower levels of OTR  
23 protein in the mPFC than PC group females ( $t(6) = 2.648$ ,  $p < 0.05$ ), but not in the NAcc or PVN.  
24 No group differences were noted for levels of female V1aR protein in the mPFC, NAcc or PVN.  
25 PD had no effect on AVP neuropeptide in the mPFC, NAcc or PVN regardless of sex (Fig. 5).

26 PVN OT signaling is necessary and sufficient for social buffering effects (Smith and Wang,  
27 2014) and is anxiolytic (Neumann et al., 2000) by suppressing hypothalamic-pituitary-adrenal  
28 (HPA) axis function. To assess whether PD reduces OT and increases CORT in serum, three hours  
29 following the social preference test, experimental mandarin voles from the PC ( $n = 6$  males, 6  
30 females) and PD ( $n = 6$  males, 6 females) groups were anesthetized with pentobarbital sodium (30  
31 mg/kg i.p.). Serum OT and CORT concentrations were monitored.

32 Two-way ANOVA revealed an interaction between treatment x sex for serum OT ( $F(1,20) =$   
33  $5.055$   $p < 0.05$ ) and CORT ( $F(1,20) = 11.755$ ,  $p < 0.01$ ). The post-hoc test indicated that  
34 pre-weaning PD significantly reduced serum OT ( $p < 0.01$ ) and increased serum CORT ( $p < 0.01$ )  
35 concentrations only in females. Female serum OT levels were much higher than males in the PC  
36 group ( $p < 0.05$ ). Female serum CORT concentrations were also much higher than males in the PD  
37 group ( $p < 0.01$ ) (Fig. 6).

### 39 **Experiment 4: Effect of microinjection of OT into the PLC on anxiety-like** 40 **behavior and social preference altered by pre-weaning PD**

41 PD reduced OT-IR fibers and OTR protein density in the mPFC (Experiment 2, 3) and OT infused  
42 into the PLC region of the mPFC reduces anxiety-like behavior (Sabihi et al., 2014b). OTRs are  
43 important for modulation of social and emotional behavior in the mPFC (Li et al, 2016). Therefore,  
44 we tested the hypothesis that microinjection of OT in the PLC restores anxiety-like behavior and

1 social preference altered by pre-weaning PD. To this end, we implanted bilateral injection  
2 cannulas into the PLC. After three days of recovery, subjects received an intra-PLC injection (Fig.  
3 7A–C) of CSF (male = 6, female = 6), OT (male: 1 ng OT = 6, 10 ng OT = 6; female: 1 ng OT = 6,  
4 10 ng OT = 6) or OT plus OTA (male: 10 ng OT/10 ng OTA = 6, 10 ng OT/100 ng OTA = 5;  
5 female: 1 ng OT/10 ng OTA = 5, 1 ng OT/100 ng OTA = 5). Levels of anxiety-like behavior and  
6 social preference were then measured.

7 One-way ANOVA showed that microinjection of OT in the PLC increased the percentage of  
8 time spent in the central area for males (10 ng:  $p < 0.01$ ) and females (1 ng:  $p < 0.05$  and 10 ng:  $p$   
9  $< 0.01$ ) exposed to pre-weaning PD, while OT plus either dose of OTA had no effect (except male  
10 10 ng OT/10 ng OTA,  $p < 0.05$ ). No differences were found between treatment groups for total  
11 distance travelled (Fig. 7).

12 Two-way ANOVA found a main effect of the absence/presence of a stimulus mandarin vole in  
13 both sexes (male:  $F(1,48) = 23.254$ ,  $p < 0.01$ ; female:  $F(1,46) = 18.952$ ,  $p < 0.01$ ). However, there  
14 were no interactions between treatment and the absence/presence of the stimulus vole in both  
15 sexes. OT-treated males (10 ng) and females (1 ng and 10 ng) demonstrated a preference for the  
16 social stimulus over the object stimulus ( $p < 0.01$ ), while subjects treated with OT plus either dose  
17 of OTA showed no preference (except for males receiving 10 ng OT/10 ng OTA,  $p < 0.01$ ) (Fig.  
18 7).

## 19 Discussion

20

21 The present study found that pre-weaning PD possibly disrupts emotional attachment in mandarin  
22 vole pups, as evidenced by increased levels of anxiety-like behavior and attenuated social  
23 preference in male and female adults (Experiment 1). PD reduced mPFC OT-IR fibers and PVN  
24 OT-IR neurons (Experiment 2), and decreased mPFC OTR protein in females, OTR and V1aR  
25 protein in males, and reduced serum OT and increased CORT in females (Experiment 3). We then  
26 demonstrated that intra-PLC OT injection restored anxiety-like behavior and social preference  
27 altered by pre-weaning PD (Experiment 4).

28 In this study, PND 14–21 PD increased anxiety-like behavior and reduced social preference in  
29 both sexes. This is consistent with studies in animals and other humans that early severe  
30 deprivation is associated with behavioral abnormalities (Rosenblum and Harlow, 1963; Rutter et  
31 al., 2001). The current result is also supported by one of our previous studies that PND 14–21  
32 offspring show emotional attachment to fathers (He et al., 2017). Thus, PND 14–21 PD should  
33 disrupt emotional attachment to fathers and adversely affect emotion and sociability. These effects  
34 are similar to previous findings that neonatal PD during PND 1–21 increases anxiety (Yu et al.,  
35 2011) and reduces sociability (Jia et al., 2009; Bambico et al., 2013; Farrell et al., 2016). We infer  
36 that the disruption of attachment between pups and fathers during PND 14–21 increases levels of  
37 anxiety and reduce levels of sociability.

38 The present study found that PND 14–21 PD reduced mPFC OT-IR fibers and OTR protein in  
39 both sexes, but did not affect levels of AVP. The PLC may receive long range axonal projections  
40 from OT-producing neurons. PD also decreased OT-IR neurons in the PVN. Because  
41 oxytocinergic neurons within the PVN project to the mPFC (Lieberwirth and Wang, 2016), a  
42 decrease in OT-IR neurons in the PVN possibly led to a reduction in OT-IR fibers in the mPFC. A  
43 previous study found that OT in the PL region of the mPFC decreased anxiety regardless of sex,



1 and neither AVP nor OTR-A affected anxiety-like behavior (Sabihi et al., 2014b). Blocking OTR  
2 in the mPFC enhances postpartum anxiety, but has no effect on anxiety in virgin females (Sabihi et  
3 al., 2014a). OTR knockout mice display deficits in social approach behavior (Nishimori et al.,  
4 2008) and social memory (Lee et al., 2008). Thus, OTR in the mPFC may play different roles  
5 under different physiological and pathological conditions. PVN OT neurons predominantly  
6 express vesicular glutamate transporter 2, suggesting that depolarization of these neurons is  
7 coupled with synaptic glutamate release in their projections such as those to the mPFC (Kawasaki  
8 et al., 2005; Johnson and Young, 2017). In addition, a specific class of interneurons (OxtrINs) in  
9 the mPFC is critical to the modulation of social and emotional behavior in both sexes (Li et al,  
10 2016). It is probable that OT neurons releasing Glutamate activate local GABA-interneurons in  
11 the mPFC, leading to reduced anxiety and regulated social behavior. Thus, we conclude that  
12 disruption to attachment between pups and fathers increases levels of anxiety and impairs social  
13 preference via a decrease in OT-IR fibers and OTR protein in the mPFC.

14 PND 14–21 PD decreased V1aR protein in males but had no effect on levels of V1aR protein in  
15 females. Sex differences in the OT system may therefore be implicated in sex-specific regulation  
16 of impaired social behavior (Smeltzer, 2006; Dumais and Veenema, 2016). V1aR and OTR show  
17 distinct and largely nonoverlapping expression in the rodent brain (Dumais and Veenema, 2016).  
18 Female prairie voles had higher densities of OTR binding but lower densities of V1aR binding  
19 than males in the mPFC (Smeltzer, 2006). Intracerebroventricular (ICV) injections of OT induce  
20 social communication by activating V1aR in male Syrian hamsters (Song et al., 2014). Studies  
21 have shown that some of the prosocial effects of OT may be mediated by the V1aR in males (Sala  
22 et al., 2011; Ramos et al., 2013) and that V1aR knockout mice have impaired social interaction  
23 (Egashira et al, 2007). V1aR is G protein-coupled receptor, similar to the OTR. We speculate that  
24 OT possibly regulates anxiety-like behavior and social preference in males via OTR and V1aR in  
25 the PLC.

26 PND 14–21 PD did not affect NAcc OT-IR fibers and OTR-IR densities in either sex. This is  
27 inconsistent with the previous finding that PD (PND 1–21) alters levels of OTR mRNA expression  
28 in the NAcc (Cao et al., 2014). These discrepancies may result from different deprivation periods,  
29 however, this requires further experimentation.

30 PND 14–21 PD reduced serum OT levels and increased serum CORT levels in females, but  
31 not males. This result may be consistent with our previous work (Cao et al., 2014; Wu et al., 2014).  
32 We also found that disruption of early emotional attachment reduced OT-IR neurons in the PVN.  
33 These results suggest that OT magnocellular neurons in the hypothalamic nuclei may have  
34 reduced OT into the peripheral circulation via the posterior pituitary (Ludwig and Leng, 2006).  
35 During some prosocial behavior, OT is released into plasma and centrally in females (Ross et al.,  
36 2009; Churchland and Winkielman, 2012). Maternal separation is known to decrease PVN OT-IR  
37 neurons in females, but not males (Veenema et al., 2007). One possibility is that females have  
38 higher ratings of fear, irritability and unhappiness under psychosocial stress compared to males  
39 (Lee et al., 2013). Another reason for these discrepancies may be different treatments (maternal  
40 separation and PD) and different sensitivities to neonatal stress in different species. OT can  
41 directly modulate the stress reactive HPA axis (Acevedo-Rodriguez, et al., 2015). Females exhibit  
42 not only higher HPA reactivity under basal conditions than males, but also after chronic stress  
43 (Hillerer et al., 2013). ICV (Windle et al., 1997) and PVN (Smith and Wang, 2014) administration  
44 of OT decreases circulating CORT and anxiety-like behavior. Thus, higher serum CORT induced

1 by pre-weaning PD may be explained in part by the decrease in PVN OT.

2 A major finding in the current study is that OT microinjection directly into the PLC of males  
3 (10 ng) and females (1 ng and 10 ng) restored changes to anxiety-like behavior and social  
4 preference resulting from PD, while voles treated with OT plus either dose of OTA did not exhibit  
5 reversal of any kind (except for the male 10 ng OT/10 ng OTA group). This is consistent with  
6 previous findings that OT in the PLC reduces anxiety-like behavior in both sexes (Sabihi et al.,  
7 2014b). Injection of highly specific OTA into the PLC region of the mPFC increases anxiety-like  
8 behavior in postpartum females (Sabihi et al., 2014a) and OTR blockade in the postpartum PLC  
9 impairs maternal care behavior and enhanced maternal aggression (Sabihi et al., 2014a). OxtrINs  
10 were identified in the mouse mPFC that express OTR and are activated in response to OT  
11 (Nakajima et al, 2014). OxtrINs are important for the modulation of social and emotional behavior  
12 in males and females, and are a molecular mechanism that acts on local mPFC circuits to  
13 coordinate responses to OT and corticotropin-releasing hormone (Li et al, 2016). Similarly, OT  
14 infusion into the PLC reverses amphetamine-induced deficits in social bonding (Young et al.,  
15 2014). OT and dopamine (DA) interaction regulate affiliative social behaviors (Liu and Wang,  
16 2003; Shahrokh et al., 2010). Father absence in the monogamous California mouse impairs social  
17 behavior and decreases pyramidal neuronal responses to DA in the mPFC (Bambico et al., 2013).  
18 Oxytocin injected into the ventral tegmental area increased extracellular DA concentration in the  
19 dialysate from the mPFC (Sanna et al., 2012). Therefore, there is likely to be a reciprocal  
20 interaction between OT and DA to regulate social behavior in the mPFC, and mPFC OT may be a  
21 promising target for treating emotional and social disorders induced by adverse early experiences.

22 Mandarin voles can be used as an animal model to investigate the effects of early emotional  
23 attachment disruption on the adult brain and behavior and underlying mechanism (He et al., 2017).  
24 Disruption to early emotional attachment between pups and fathers impairs emotional and social  
25 behavior and leads to OT system dysfunction in the brain. We provide intriguing evidence that  
26 site-specific OT action in the PLC has potential beneficial effects on the recovery of emotional and  
27 social dysfunction induced by the disruption to early emotional attachment. The modulation of OT  
28 on emotion and social behavior was sex-specific. Therefore, OT may be potentially targeted to  
29 ameliorate social and emotional deficits resulting from early adverse experiences.

30

## 31 **Methods and Materials**

32

### 33 **Subjects**

34 Animals were a laboratory-reared offspring originating from a wild population of mandarin voles  
35 in Henan, China. Animals were maintained on a 12:12 light: dark cycle with unlimited access to  
36 food (carrot and rabbit chow) and were provided with water and cotton nesting material in  
37 polycarbonate cages (44 cm x 22 cm x 16 cm).

38 For the paternal deprivation (PD) treatment, fathers (F1 generation) were removed permanently  
39 from the home cage after pups (F2 generation) were 14 days of age until weaning at PND 21. For  
40 the biparental care control group (PC), all family members were housed in their home cage and  
41 left undisturbed until pups were weaned at 21 days of age. Offspring at 70 days of age were tested  
42 using the behavioral paradigms below. In the female, only experimental data from diestrous  
43 individuals were included to avoid effects from the estrous cycle.

1

## 2 **Open field test (OFT)**

3 To assess the impact of pre-weaning PD on adult anxiety-like behavior, F2 mandarin voles were  
4 observed in the OFT on PND 70. Subjects were placed in a center of an open-field arena (50 cm x  
5 50 cm x 25 cm), and the duration and distance moved within the center or periphery was recorded  
6 using an automated system (SocialScan 2.0, Clever Sys, Reston, VA, USA). Measures include the  
7 proportion of time spent in the central area and total distance moved in the OFT.

8

## 9 **Social preference test (SPT)**

10 Immediately after the OFT, the SPT was carried out. The SPT was based on the social  
11 approach-avoidance paradigm previously described (Qiao et al., 2014). Briefly, prior to testing  
12 voles were placed in a box. The test box (50 cm length x 50 cm width x 24 cm height) was  
13 constructed of white glacial polyvinylchloride. After 5 min of habituation, an empty wire-mesh  
14 cage (object stimulus; 10 cm length x 10 cm width) was placed near one side wall of the arena for  
15 10 min, which was then exchanged for a cage containing an stranger same-sex con-specific (social  
16 stimulus) for an additional 10 min. Behavioral responses to an empty cage or to a cage with a  
17 stimulus individual were videotaped, and scored and quantified afterwards using OBSERVER  
18 v5.0 (vNoldus, NL). Measures included the time spent investigating the object and social stimulus.  
19 Data are presented as investigation time/total time (10 min) x 100%.

20

## 21 **Elisa**

22 Blood was collected directly in microcentrifuge vials from the heart (Cao et al., 2014). After  
23 clotting, blood was centrifuged at 6000 rpm for 30 min at 4 °C. Supernatant was collected. Serum  
24 OT and CORT levels were monitored by a vole-specific enzyme-linked immunosorbent assay  
25 (Shanghai Xitang Biotechnology, Shanghai, China), according to the manufacturers' instructions.  
26 The resultant absorbance was measured at 450 nm using a Metertech microplate reader (BioTek  
27 Instruments, Winooski, USA) after the reader was zeroed using the blank well. Variation between  
28 duplicate measurements was less than 5%.

29

## 30 **Immunohistochemistry**

31 20 $\mu$ m (mPFC) and 40  $\mu$ m (NAcc and PVN) thick coronal slices were prepared on a cryostat  
32 (CM1950, Leica, Germany). Sections were rinsed with 0.01 M phosphate buffer solution (PBS)  
33 for 10 minutes following incubation with 0.6% H<sub>2</sub>O<sub>2</sub> for 20 min, and rinsed for 3 x 5 min with  
34 0.01 M PBS. Sections were then preincubated for 60 min with in blocking solution (normal goat  
35 serum, AR0009, Boster Company). Sections were incubated for 48 h at 4 °C in mouse monoclonal  
36 antibody OT (MAB5296, 1:7500, Chemicon-Millipore) diluted in antibody diluent (0.01 M PBS  
37 containing 20% bovine serum albumin and 1.7% Triton X-100). The following day, sections were  
38 rinsed 3 x 5 min with 0.01 M PBS and incubated in the secondary antibody DyLight  
39 488-conjugated goat anti-mouse (BA1126, 1:200, Boster Company) for 60 min in a 37 °C water  
40 bath. Afterwards, sections were rinsed for 3 x 5 min with 0.01 M PBS and fixed with antifade  
41 solution (AR1109, Boster Company). Slices were photographed with a microscope and Nikon  
42 camera (Tokyo, Japan). For each vole, OT-immunoreactive fibers (mPFC and NAcc) and the  
43 number of OT-IR neurons (PVN) were counted, three representative sections from anterior to  
44 posterior anatomically matched between subjects were chosen to minimize variability. The count



1 of OT-IR cells (Song et al., 2010) and OT-immunoreactive fibers (DiBenedictis et al., 2017)  
2 followed the method of the previous report. All immunohistochemistry procedures included  
3 sections of negative controls (the primary antibody was not added). An observer blind to  
4 experimental conditions performed the entire analysis. The number of positive neurons (PVN) and  
5 positive fibers (NAcc and mPFC) was quantified from images acquired under a 10X (PVN), 20X  
6 (NAcc) and 40X (mPFC) objective using the cell counter (PVN) and the value of integrated  
7 optical density (IOD) plugin in Image-pro-plus; these were averaged across three nonoverlapping  
8 sections in an evenly spaced series per animal.

9

## 10 **Western blotting**

11 Brains were immediately extracted and frozen in dry ice. Coronal sections (200  $\mu$ m) were cut on a  
12 cryostat and frost mounted onto microscope slides. Bilateral tissue punches with a 1 mm diameter  
13 were taken from the entire mPFC (Cg and PLC), NAcc and PVN and stored at -80  $^{\circ}$ C until  
14 processing. Total proteins were extracted with RIPA lysis buffer containing protease inhibitors  
15 (R0010, Solarbio Biotechnology). Protein samples were separated by sodium dodecyl  
16 sulphate-polyacrylamide gel electrophoresis and transferred to PVDF membranes (Millipore,  
17 Billerica, MA, USA). The membrane was incubated with the following diluted primary antibodies:  
18 OTR (ab181077, 1:2000, Abcam), V1aR (GTX89114, 1:7000, GeneTex), AVP (AB1565, 1:4000,  
19 Millipore),  $\beta$ -Tubulin (CW0098M, 1:5000, ComWin Biotechnology), at 4  $^{\circ}$ C overnight. Following  
20 washing, the membrane was incubated with horseradish peroxidase-conjugated secondary  
21 antibodies (1:10000, ZhongShan Goldenbridge Biotechnology); membranes were revealed with  
22 ECL (WBKLS0500, Millipore) and exposed on Luminescent Imaging (Tanon 6200 Luminescent  
23 Imaging Workstation, Tanon). Quantification was performed using ImageJ software, and all  
24 signals were normalized within the same membrane to  $\beta$ -Tubulin.

25

## 26 **Stereotaxic cannulation and microinjection**

27 At 70 days of age, mandarin voles in the PD group were anesthetized by isoflurane, and 26-gauge  
28 bilateral steel guide cannulae (R.W.D. Life Science, Shenzhen, China) were stereotaxically  
29 implanted aimed at the PLC (coordinates from bregma: anterior, 2.2 mm; bilateral,  $\pm$ 0.5 mm;  
30 ventral, 2.2 mm). Voles were allowed 3 d of post-operative recovery. The CSF (200 nl/side), CSF  
31 containing OT (1 ng/200 nl/side or 10 ng/200 nl/side), or CSF containing OT (male 10 ng OT;  
32 female: 1 ng OT) plus OTA (10 ng/200 nl/side or 100 ng/200 nl/side) were injected into the PLC.  
33 All microinjections were made with a 33-gauge needle that extended 1 mm below the guide  
34 cannula and delivered at a rate of 0.1  $\mu$ l/min as previously described (Young et al., 2014). Data  
35 were excluded if tips were located in other brain regions. The final size of each group was 6  
36 except for the 10 ng OT/100 ng OTA male group which numbered 5, and the 1 ng OT/10 ng OTA  
37 and 1 ng OT/100 ng OTA female groups (both n = 5).

38

## 39 **Data analysis**

40 Parametric tests were used because all data were normally distributed according to one-sample  
41 Kolmogorov–Smirnov tests. Independent sample *t*-tests were used to assess differences in  
42 behavior in the OFT (Experiment 1), levels of OTR, V1aR and AVP protein in different brain  
43 regions. The significance level was set at  $p < 0.05$ . The SPT (factors: treatment  $\times$  stimulus); serum  
44 OT and CORT concentration (factors: treatment  $\times$  sex); mPFC (IOD), NAcc (IOD) and PVN (the

1 number of positive neurons) OT-IR (factors: treatment  $\times$  sex) were analyzed using two-way  
2 ANOVA, paired t-tests were used to compare approach/avoidance with Bonferroni correction for  
3 multiple comparisons (given that two groups were examined in Experiment 1, and five groups  
4 were examined in Experiment 4, the threshold for significance was set as  $p < 0.025$  and  $p < 0.01$ ,  
5 respectively). The OFT (Experiment 4) were analyzed using one-way ANOVA. Data were  
6 presented as mean  $\pm$  SEM, all statistical procedures were performed using SPSS 17.0.  
7

## 8 Acknowledgements

9 This work was supported by the National Natural Science Foundation of China (grants 31372213 and 31170377)  
10 and Fundamental Research Funds for Central University (GK201305009). Prof. Tai designed the study and wrote  
11 the protocol. Zhixiong He conducted the majority of the work, the statistical analysis and wrote the first draft of the  
12 manuscript. Limin Wang, Wei Yuan and Rui Jia discussed the results and provided constructive comments.  
13 Wenjuan Hou, Jinfeng Yang, Yang Yang and Luo Luo helped care for voles.  
14

## 15 Additional Information

16

### 17 Funding

18

| Funder                                               | Grant reference number | Author    |
|------------------------------------------------------|------------------------|-----------|
| National Natural Science Foundation                  | Grant 31372213         | Fadao Tai |
| National Natural Science Foundation                  | Grant 31170377         | Fadao Tai |
| Fundamental Research Funds for<br>Central University | GK201305009            | Fadao Tai |
| National Natural Science Foundation                  | Grant 31260513         | Fadao Tai |

The funders had no role in study design, data collection and interpretation, or the decision to submit the work for publication.

19

### 20 Author contributions

21 ZH, Conceptualization, Data curation, Methodology, Writing—original draft, Writing—review and editing; LW,  
22 LL, RJ, WY, Conceptualization, Investigation, Methodology, Writing—review and editing; WH, JY, YY,  
23 Conceptualization, Resources, Supervision, Methodology, Writing—review and editing; FT, Conceptualization,  
24 Resources, Formal analysis, Supervision, Funding acquisition, Methodology, Writing—original draft,  
25 Writing—review and editing  
26

27

### 28 Author ORCIDs

29 Fadao Tai, <http://orcid.org/0000-0002-6804-4179>

30

### 31 Ethics

32 Animal experimentation: All procedures were approved by the Animal Care and Use Committee of Shaanxi  
33 Normal University and were in accordance with the Guide for the Care and Use of Laboratory Animals of China.  
34

## 34 References

- 1 Acevedo-Rodriguez A, Mani SK, Handa RJ. 2015. Oxytocin and estrogen receptor  $\beta$  in the brain: an overview.  
2 *Frontiers in Endocrinology* **6**:160.
- 3 Agid O, Shapira B, Zislin J, Ritsner M, Hanin B, Murad H, Troudart T, Bloch M, Heresco-Levy U, Lerer B. 1999.  
4 Environment and vulnerability to major psychiatric illness: a case control study of early parental loss in major  
5 depression, bipolar disorder and schizophrenia. *Molecular Psychiatry* **4**:163–172.
- 6 Ahern TH, Young LJ. 2009. The impact of early life family structure on adult social attachment, alloparental  
7 behavior, and the neuropeptide systems regulating affiliative behaviors in the monogamous prairie vole  
8 (*Microtus ochrogaster*). *Frontiers in Behavioral Neuroscience* **3**: 17.
- 9 Bambico FR, Lacoste B, Hattan PR, Gobbi G. 2013. Father absence in the monogamous California mouse impairs  
10 social behavior and modifies dopamine and glutamate synapses in the medial prefrontal cortex. *Cerebral*  
11 *Cortex* **25**: 1163–1175.
- 12 Barrett CE, Arambula SE, Young LJ, 2015. The oxytocin system promotes resilience to the effects of neonatal  
13 isolation on adult social attachment in female prairie voles. *Translational Psychiatry* **5**:e606.
- 14 Bernet CZ, Stein MB, 1999. Relationship of childhood maltreatment to the onset and course of major depression in  
15 adulthood. *Depress and Anxiety* **9**:169–174.
- 16 Blume A, Bosch OJ, Miklos S, Torner L, Wales L, Waldherr M, Neumann ID. 2008. Oxytocin reduces anxiety via  
17 ERK1/2 activation: local effect within the rat hypothalamic paraventricular nucleus. *European journal of*  
18 *neuroscience* **27**:1947–1956.
- 19 Brown GW, Harris T, Copeland JR, 1977. Depression and loss. *The British Journal of Psychiatry* **130**:1–18.
- 20 Burkett JP, Andari E, Johnson ZV, Curry DC, de Waal FB, Young LJ. 2016. Oxytocin-dependent consolation  
21 behavior in rodents. *Science* **351**: 375-378.
- 22 Caba M, Rovirosa MJ, Silver R. 2003. Suckling and genital stroking induces fos expression in hypothalamic  
23 oxytocinergic neurons of rabbit pups. *Developmental Brain Research* **143**:119–128.
- 24 Cao Y, Wu R, Tai F, Zhang X, Yu P, An X, Qiao X, Hao P. 2014. Neonatal paternal deprivation impairs social  
25 recognition and alters levels of oxytocin and estrogen receptor  $\alpha$  mRNA expression in the MeA and NAcc, and  
26 serum oxytocin in mandarin voles. *Hormones and Behavior* **65**:57–65.
- 27 Carrier N, Kabbaj M. 2012. Sex differences in social interaction behaviors in rats are mediated by extracellular  
28 signal-regulated kinase 2 expression in the medial prefrontal cortex. *Neuroscience* **212**:86–92.
- 29 Chini B, Manning M. 2007. Agonist selectivity in the oxytocin/vasopressin receptor family: new insights and  
30 challenges. *Biochemical Society Transactions* **35**:737–741.
- 31 Churchland PS, Winkielman P. 2012. Modulating social behavior with oxytocin: how does it work? What does it  
32 mean? *Hormones and Behavior* **61**:392–399.
- 33 Coria-Avila GA, Manzo J, Garcia LI, Carrillo P, Miquel M, Pfaus JG. 2014. Neurobiology of social attachments.  
34 *Neuroscience and Biobehavioral Reviews* **43**:173–182.
- 35 Dibeneditis BT, Nussbaum ER, Cheung HK, Veenema AH. 2017. Quantitative mapping reveals age and sex  
36 differences in vasopressin, but not oxytocin, immunoreactivity in the rat social behavior neural  
37 network. *Journal of Comparative Neurology* **525**:2549–2570.
- 38 Dumais KM, Veenema AH. 2016. Vasopressin and oxytocin receptor systems in the brain: sex differences and  
39 sex-specific regulation of social behavior. *Frontiers in Neuroendocrinology* **40**:1–23.
- 40 Egashira N, Tanoue A, Matsuda T, Koushi E, Harada S, Takano Y, Tsujimoto G, Mishima K, Iwasaki, K, Fujiwara,  
41 M. 2007. Impaired social interaction and reduced anxiety-related behavior in vasopressin V1a receptor  
42 knockout mice. *Behavioural Brain Research* **178**:123–127.
- 43 Farrell MR, Holland FH, Shansky RM, Brenhouse HC. 2016. Sex-specific effects of early life stress on social  
44 interaction and prefrontal cortex dendritic morphology in young rats. *Behavioural Brain*

- 1           *Research* 310:119–125.
- 2   Giachino C, Canalia N, Capone F, Fasolo A, Alleva E, Riva MA, Cirulli F, Peretto P. 2007. Maternal deprivation  
3           and early handling affect density of calcium binding protein-containing neurons in selected brain regions and  
4           emotional behavior in periadolescent rats. *Neuroscience*, 145:568–578.
- 5   Gos T, Schulkin J, Gos A, Bock J, Poeggel G, Braun K. 2014. Paternal deprivation affects the functional maturation  
6           of corticotropin-releasing hormone (CRH)- and calbindin-d28k-expressing neurons in the bed nucleus of the  
7           stria terminalis (BNST) of the biparental *Octodon degus*. *Brain Structure and Function* 219:1983–1990.
- 8   Grossmann K, Grossmann KE, Fremmer-Bombik E, Kindler H, Scheuerer-Englisch H, Zimmerman P. 2002. The  
9           uniqueness of the child-father attachment relationship: Fathers' sensitive and challenging play as a pivotal  
10           variable in a 16-year longitudinal study. *Social Development* 11:307–331.
- 11   He Z, Zhang S, Yu C, Li Y, Jia R, Tai F. 2017. Emotional attachment of pre-weaning pups to mothers and fathers in  
12           mandarin voles. *Behavioural Processes* 135: 87–94.
- 13   Heidbreder CA, Groenewegen HJ. 2003. The medial prefrontal cortex in the rat: evidence for a dorso-ventral  
14           distinction based upon functional and anatomical characteristics. *Neuroscience and Biobehavioral Reviews*  
15           27:555–579.
- 16   Helmeke C, Seidel K, Poeggel G, Bredy TW, Abraham A, Braun K. 2009. Paternal deprivation during infancy  
17           results in dendrite- and time-specific changes of dendritic development and spine formation in the  
18           orbitofrontal cortex of the biparental rodent *Octodon degus*. *Neuroscience* 163:790–798.
- 19   Hillner KM, Neumann ID, Couillarddespres S, Aigner L, Slattery DA. 2013. Sex-dependent regulation of  
20           hippocampal neurogenesis under basal and chronic stress conditions in rats. *Hippocampus* 23, 476–487.
- 21   Jablonska B, Lindberg L. 2007. Risk behaviors, victimisation and mental distress among adolescents in different  
22           family structures. *Social Psychiatry and Psychiatric Epidemiology* 42:656–663.
- 23   Jia R, Tai FD, An SC, Zhang X, Broders H. 2009. Effects of neonatal paternal deprivation or early deprivation on  
24           anxiety and social behaviors of the adults in mandarin voles. *Behavioural Processes* 82:271–278.
- 25   Jia R, Tai F, An S, Zhang X. 2011. Neonatal paternal deprivation or early deprivation reduces adult parental  
26           behavior and central estrogen receptor  $\alpha$  expression in mandarin voles (*Microtus mandarinus*). *Behavioural*  
27           *Brain Research* 224: 279–289.
- 28   Johnson ZV, Young LJ. 2017. Oxytocin and vasopressin neural networks: implications for social behavioral  
29           diversity and translational neuroscience. *Neuroscience and Biobehavioral Reviews* 76:87–98.
- 30   Kawasaki A, Hoshi K, Kawano M, Nogami H, Yoshikawa H, Hisano S. 2005. Up-regulation of VGLUT2  
31           expression in hypothalamic-neurohypophysial neurons of the rat following osmotic challenge. *European*  
32           *Journal of Neuroscience* 22:672–680.
- 33   Kleiman DG, Malcolm JR. 1981. The evolution of male parental investment, in mammals. In: Gubernick DJ,  
34           Klopfer PH. (Eds.), *Parental Care in Mammals*. Plenum Press, New York, pp. 347–387.
- 35   Koe AS, Ashokan A, Mitra R. 2016. Short environmental enrichment in adulthood reverses anxiety and basolateral  
36           amygdala hypertrophy induced by maternal separation. *Translational Psychiatry* 6: e729.
- 37   Lee E, Rhim I, Lee JW, Ghim JW, Lee S, Kim E, Jung MW. 2016. Enhanced neuronal activity in the medial  
38           prefrontal cortex during social approach behavior. *Journal of Neuroscience* 36:6926–6936.
- 39   Lee HJ, Caldwell HK, Macbeth AH, Tolu SG, Young WS 3rd. 2008. A conditional knockout mouse line of the  
40           oxytocin receptor. *Endocrinology* 149:3256–3263.
- 41   Lee JH, Kim HJ, Kim JG, Ryu V, Kim BT, Kang DW, Jahng JW. 2007. Depressive behaviors and decreased  
42           expression of serotonin reuptake transporter in rats that experienced neonatal maternal separation.  
43           *Neuroscience Research* 58, 32–39.
- 44   Lee MR, Cacic K, Demers CH, Haroon M, Heishman S, Hommer DW, Epstein DH, Ross TJ, Stein EA, Heilig

- 1 M, Salmeron BJ. 2013. Gender differences in neural-behavioral response to self-observation during a novel  
2 fMRI social stress task. *Neuropsychologia* **53**:257–263.
- 3 Leng G, Meddle SL, Douglas AJ. 2008. Oxytocin and the maternal brain. *Current Opinion in Pharmacology*  
4 **8**:731–734.
- 5 Li K, Nakajima M, Ibañez-Tallon I, Heintz N. 2016. A cortical circuit for sexually dimorphic oxytocin-dependent  
6 anxiety behaviors. *Cell* **167**:60–72.
- 7 Lieberwirth C, Wang Z. 2016. The neurobiology of pair bond formation, bond disruption, and social  
8 buffering. *Current Opinion in Neurobiology* **40**:8–13.
- 9 Lisboa SF, Stecchini MF, Corrêa FM, Guimarães FS, Resstel LB. 2010. Different role of the ventral medial  
10 prefrontal cortex on modulation of innate and associative learned fear. *Neuroscience* **171**:760–768.
- 11 Liu D, Diorio J, Tannenbaum B, Caldji C, Francis D, Freedman A, Sharma S, Pearson D, Plotsky PM, Meaney MJ.  
12 1997. Maternal care, hippocampal glucocorticoid receptors, and hypothalamic-pituitary-adrenal responses to  
13 stress. *Science* **277**:1659–1662.
- 14 Liu Y, Wang ZX, 2003. Nucleus accumbens oxytocin and dopamine interact to regulate pair bond formation in  
15 female prairie voles. *Neuroscience* **121**:537–544.
- 16 Ludwig M, Leng G. 2006. Dendritic peptide release and peptide-dependent behaviours. *Nature Reviews*  
17 *Neuroscience* **7**:126–136.
- 18 Ma Y, Li S, Wang C, Liu Y, Li W, Yan X, Chen Q, Han S. 2016. Distinct oxytocin effects on belief updating in  
19 response to desirable and undesirable feedback. *PNAS* **113**:9256–9261.
- 20 Marlin BJ, Mitre M, D'Amour JA, Chao MV, Froemke RC. 2015. Oxytocin enables maternal behaviour by  
21 balancing cortical inhibition. *Nature* **520**, 499–504.
- 22 Meaney MJ, 2001. Maternal care, gene expression, and the transmission of individual differences in stress  
23 reactivity across generations. *Annual Review of Neuroscience* **24**:1161–1192.
- 24 Nakajima N, Göllich A, Heintz N. 2014. Oxytocin modulates female sociosexual behavior through a specific class  
25 of prefrontal cortical interneurons. *Cell* **159**:295–305.
- 26 Neumann ID, Wigger A, Torner L, Holsboer F, Landgraf R. 2000. Brain oxytocin inhibits basal and stress-induced  
27 activity of the hypothalamo-pituitary-adrenal axis in male and female rats: Partial action within the  
28 paraventricular nucleus. *Journal of Neuroendocrinology* **12**:235–243.
- 29 Nishimori K, Takayanagi Y, Yoshida M, Kasahara Y, Young LJ, Kawamata M. 2008. New aspects of oxytocin  
30 receptor function revealed by knockout mice: sociosexual behaviour and control of energy balance. *Progress*  
31 *in Brain Research* **170**:79–90.
- 32 Niu B, Liu P, Shen M, Liu C, Wang L, Wang F, Ma L. 2017. GRK5 regulates social behavior via suppression of  
33 mTORC1 signaling in medial prefrontal cortex. *Cerebral Cortex* **27**:1–12.
- 34 Oettl LL, Ravi N, Schneider M, Scheller M, Schneider P, Mitre M, da Silva Gouveia M, Froemke RC, Chao  
35 MV, Young WS, Meyer-Lindenberg A, Grinevich V, Shusterman R, Kelsch W. 2016. Oxytocin enhances social  
36 recognition by modulating cortical control of early olfactory processing. *Neuron* **90**:609–621.
- 37 Onaka T. 2004. Neural pathways controlling central and peripheral oxytocin release during stress. *Journal of*  
38 *Neuroendocrinology* **16**:308–312.
- 39 Ovtscharoff W Jr, Helmeke C, Braun K. 2006. Lack of paternal care affects synaptic development in the anterior  
40 cingulate cortex. *Brain Research* **1116**:58–63.
- 41 Qiao X, Yan Y, Tai F, Wu R, Hao P, Fang Q, Zhang S. 2014. Levels of central oxytocin and glucocorticoid receptor  
42 and serum adrenocorticotrophic hormone and corticosterone in mandarin voles with different levels of  
43 sociability. *Behavioural Brain Research* **274**, 226–234.
- 44 Ramos L, Hicks C, Kevin R, Caminer A, Narlawar R, Kassiou M, McGregor IS. 2013. Acute prosocial effects of



- 1 oxytocin and vasopressin when given alone or in combination with 3,4-methylenedioxyamphetamine in  
2 rats: involvement of the VIA receptor. *Neuropsychopharmacology* **38**: 2249–2259.
- 3 Rees SL, Steiner M, Fleming AS, 2006. Early deprivation, but not maternal separation, attenuates rise in  
4 corticosterone levels after exposure to a novel environment in both juvenile and adult female rats.  
5 *Behavioural Brain Research* **175**:383–391.
- 6 Reinherz HZ, Giaconia RM, Hauf AM, Wasserman MS, Silverman AB, 1999. Major depression in the transition to  
7 adulthood: risks and impairments. *Journal of Abnormal Psychology* **108**:500–510.
- 8 Rosenblum LA, Harlow HF. 1963. Approach-avoidance conflict in the mother-surrogate situation. *Psychology*  
9 *Reports* **12**:83–85.
- 10 Ross HE, Cole CD, Smith Y, Neumann ID, Landgraf R, Murphy AZ, Young LJ. 2009. Characterization of the  
11 oxytocin system regulating affiliative behavior in female prairie voles. *Neuroscience* **162**:892–903.
- 12 Rutter ML, Kreppner JM, O'Connor TG. 2001. Specificity and heterogeneity in children's responses to profound  
13 institutional privation. *British Journal of Psychiatry* **179**:97–103.
- 14 Sabihi S, Dong SM, Durosko NE, Leuner B. 2014a. Oxytocin in the medial prefrontal cortex regulates maternal  
15 care, maternal aggression and anxiety during the postpartum period. *Frontiers in Behavioral Neuroscience*  
16 **8**:258.
- 17 Sabihi S, Durosko NE, Dong SM, Leuner B. 2014b. Oxytocin in the prelimbic medial prefrontal cortex reduces  
18 anxiety-like behavior in female and male rats. *Psychoneuroendocrinology* **45**:31–42.
- 19 Sachs BD, Rodriguiz RM, Siesser WB, Kenan A, Royer EL, Jacobsen JP, Wetsel WC, Caron MG. 2013. The  
20 effects of brain serotonin deficiency on behavioural disinhibition and anxiety-like behaviour following mild  
21 early life stress. *International Journal of Neuropsychopharmacology* **16**:2081–2094.
- 22 Saitoh A, Ohashi M, Suzuki S, Tsukagoshi M, Sugiyama A, Yamada M, Oka J, Inagaki M, Yamada M. 2014.  
23 Activation of the prelimbic medial prefrontal cortex induces anxiety-like behaviors via N-Methyl-D-aspartate  
24 receptor-mediated glutamatergic neurotransmission in mice. *Journal of Neuroscience Research*  
25 **92**:1044–1153.
- 26 Sala M, Braida D, Lentini D, Busnelli M, Bulgheroni E, Capurro V, Finardi A, Donzelli A, Pattini L, Rubino T,  
27 Parolaro D, Nishimori K, Parenti M, Chini B. 2011. Pharmacologic rescue of impaired cognitive flexibility,  
28 social deficits, increased aggression, and seizure susceptibility in oxytocin receptor null mice: a  
29 neurobehavioral model of autism. *Biological Psychiatry* **69**:875–882.
- 30 Sanna F, Argiolas A, Melis MR, 2012. Oxytocin-induced yawning: Sites of action in the brain and interaction with  
31 mesolimbic/mesocortical and incertohypothalamic dopaminergic neurons in male rats. *Hormones and*  
32 *Behavior* **62**:505–514.
- 33 Shah AA, Treit D. 2003. Excitotoxic lesions of the medial prefrontal cortex attenuate fear responses in the  
34 elevated-plus maze, social interaction, and shock probe burying tests. *Brain Research* **969**:183–194.
- 35 Shahrokh DK, Zhang TY, Diorio J, Gratton A, Meaney MJ, 2010. Oxytocin-dopamine interactions mediate  
36 variations in maternal behavior in the rat. *Endocrinology* **151**: 2276–2286.
- 37 Smeltzer MD, Curtis JT, Aragona BJ, Wang Z. 2006. Dopamine, oxytocin, and vasopressin receptor binding in the  
38 medial prefrontal cortex of monogamous and promiscuous voles. *Neuroscience Letters* **394**:146–151.
- 39 Smith AS, Wang Z. 2014. Hypothalamic oxytocin mediates social buffering of the stress response. *Biological*  
40 *Psychiatry* **76**:281–288.
- 41 Sobrinho LG, Duarte JS, Paiva I, Gomes L, Vicente V, Aguiar P. 2012. Paternal deprivation prior to adolescence  
42 and vulnerability to pituitary adenomas. *Pituitary*, **15**:251–257.
- 43 Song Z, Mccann KE., Huhman KL, Albers HE. 2014. Oxytocin induces social communication by activating  
44 arginine-vasopressin v1a receptors and not oxytocin receptors. *Psychoneuroendocrinology* **50**:14–19.

- 1 Song Z, Tai F, Yu C, Wu R, Zhang X, Broders H, He F, Guo R, 2010. Sexual or paternal experiences alter  
2 alloparental behavior and the central expression of ER $\alpha$  and OT in male mandarin voles (*Microtus*  
3 *mandarinus*). *Behavioural Brain Research* **214**:290–300.
- 4 Tai FD, Wang TZ, 2001. Social organization of mandarin voles in burrow system. *Acta Theriologica Sinica*  
5 **21**:50–56.
- 6 Tai FD, Wang TZ, Zhao YJ, 2001. Mating system of mandarin vole (*Lasiopodomys mandarinus*). *Acta Zoologica*  
7 *Sinica* **47**:266–273.
- 8 Toth I, Neumann ID. 2013. Animal models of social avoidance and social fear. *Cell and Tissue*  
9 *Research* **354**:107–118.
- 10 Uvnäs-Moberg K, Handlin L, Petersson M. 2015. Self-soothing behaviors with particular reference to oxytocin  
11 release induced by non-noxious sensory stimulation. *Frontiers in Psychology* **5**:1529.
- 12 Veenema AH, Bredewold R, Neumann ID, 2007. Opposite effects of maternal separation on intermale and  
13 maternal aggression in C57BL/6 mice: link to hypothalamic vasopressin and oxytocin immunoreactivity.  
14 *Psychoneuroendocrinology* **32**:437–450.
- 15 Wang GQ, Cen C, Li C, Cao S, Wang N, Zhou, Z, Liu XM, Xu Y, Tian NX, Zhang Y, Wang J, Wang LP, Wang Y.  
16 2015. Deactivation of excitatory neurons in the prelimbic cortex via Cdk5 promotes pain sensation and  
17 anxiety. *Nature Communication*, **6**:7660.
- 18 Wei B, Tai F, Liu X, Ma L, Yang X, Jia R, Zhang X. 2013. Neonatal tactile stimulation alleviates the negative  
19 effects of neonatal isolation on novel object recognition, sociability and neuroendocrine levels in male adult  
20 mandarin voles (*Microtus mandarinus*). *Physiology & Behavior* **112-113**:14–22.
- 21 Wei L, David A, Duman RS, Anisman H, Kaffman A. 2010. Early life stress increases anxiety-like behavior in  
22 balbc mice despite a compensatory increase in levels of postnatal maternal care. *Hormones and*  
23 *Behavior* **57**:396–404.
- 24 Windle RJ, Shanks N, Lightman SL, Ingram CD. 1997. Central oxytocin administration reduces stress-induced  
25 corticosterone release and anxiety behavior in rats. *Endocrinology* **138**:2829–2834.
- 26 Wircer E, Blechman J, Borodovsky N, Tsoory M, Nunes AR, Oliveira RF, Levkowitz G. 2017. Homeodomain  
27 protein Otp affects developmental neuropeptide switching in oxytocin neurons associated with a long-term  
28 effect on social behavior. *eLife* **6**:e22170.
- 29 Wu R, Song Z, Wang S, Shui L, Tai F, Qiao X, He F. 2014. Early paternal deprivation alters levels of hippocampal  
30 brain-derived neurotrophic factor and glucocorticoid receptor and serum corticosterone and  
31 adrenocorticotropin in a sex-specific way in socially monogamous mandarin voles. *Neuroendocrinology*  
32 **100**:119–128.
- 33 Young KA, Liu Y, Gobrogge KL., Wang H, Wang Z. 2014. Oxytocin reverses amphetamine-induced deficits in  
34 social bonding: evidence for an interaction with nucleus accumbens dopamine. *Journal of Neuroscience*  
35 **34**:8499–8506.
- 36 Young LJ, Lim MM, Gingrich B, Insel TR. 2001. Cellular mechanisms of social attachment. *Hormones and*  
37 *Behavior* **40**:133–138.
- 38 Young LJ, Wang Z. 2004. The neurobiology of pair bonding. *Nature Neuroscience* **7**:1048–1054.
- 39 Yu P, An S, Tai F, Wang J, Wu R, Wang B. 2013. Early social deprivation impairs pair bonding and alters serum  
40 corticosterone and the nacc dopamine system in mandarin voles. *Psychoneuroendocrinology* **38**:3128–3138.
- 41 Yu P, Wang JL, Tai FD, Broders H, An SC, Zhang X, He FQ, An XL, Wu RY. 2011. The effects of repeated early  
42 deprivation on ultrasonic vocalizations and ontogenetic development in mandarin vole pups. *Behavioural*  
43 *Processes* **88**:162–167.
- 44 Yu P, Zhang H, Li X, He F, Tai F. 2015. Early biparental separation or neonatal paternal deprivation in mandarin

1 voles reduces adult offspring paternal behavior and alters serum corticosterone levels and  
2 neurochemistry. *Hormones and Behavior* **73**:8–14.  
3

1 **Figure 1**

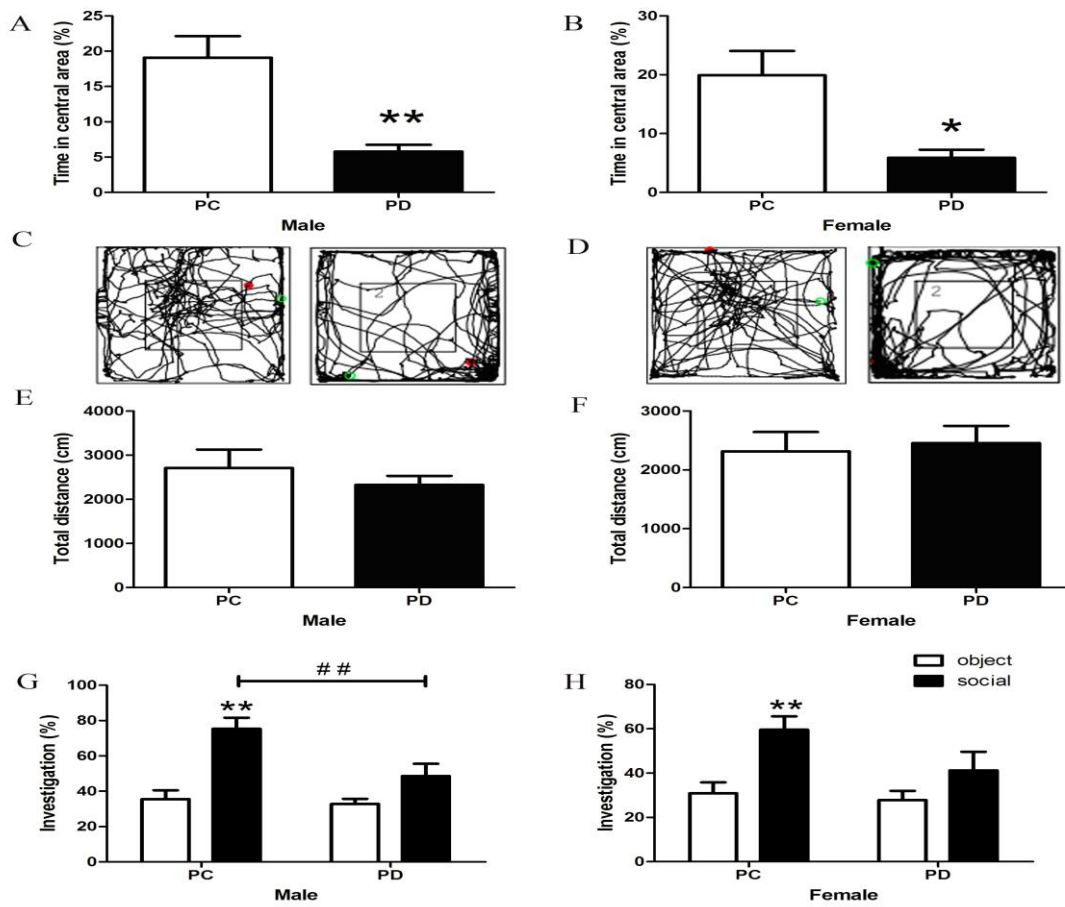

2

3

4 **Fig 1.** Effect of PD on anxiety-like behavior and social preference in adult mandarin voles. (A, B) Percentage of

5 time in the central area, (C, D) representative path and (E, F) total distance of mandarin voles in the open field test

6 (Male: PC: n = 7, PD: n = 7; Female: PC: n = 7, PD: n = 7). \*p < 0.05; \*\*p < 0.01. Independent sample t-tests.

7 Effect of PD on social preference in (G) male and (H) female mandarin voles (Male: PC: n = 7, PD: n = 7; Female:

8 PC: n = 7, PD: n = 7). Error bars indicate SEM. \*\*p < 0.025 vs. object stimulus. ## p < 0.025 vs. PC. Two-way

9 ANOVA (factors: treatment × stimulus). PC: biparental care; PD: paternal deprivation.

10

11 **Figure 1 - supplement 1**

12 **Table 1. Summary of the OFT and SPT analysis.**

|     |                              | Male             |                  | Female           |                  | Related Figure | Data analysis              |
|-----|------------------------------|------------------|------------------|------------------|------------------|----------------|----------------------------|
|     |                              | PC (n=7)         | PD (n=7)         | PC (n=7)         | PD (n=7)         |                |                            |
| OFT | Time in the central area (%) | 19.09 ± 3.05     | 5.79 ± 0.96      | 19.92 ± 4.12     | 5.88 ± 1.39      | Fig. 1A-B      | Independent sample t-tests |
|     | Total distance (cm)          | 2712.84 ± 416.70 | 2328.66 ± 201.71 | 2317.28 ± 327.28 | 2457.48 ± 290.32 | Fig. 1E-F      |                            |
| SPT | Object (%)                   | 35.51 ± 5.06     | 32.82 ± 2.87     | 30.91 ± 4.95     | 27.82 ± 4.18     | Fig. 1G-H      | Two-way ANOVA              |
|     | Social (%)                   | 75.37 ± 6.26     | 48.66 ± 6.91     | 59.56 ± 6.08     | 41.21 ± 8.43     |                |                            |

PC: biparental care; PD: paternal deprivation; OFT: Open field test; SPT: Social preference test.

13

14

1 **Figure 2**

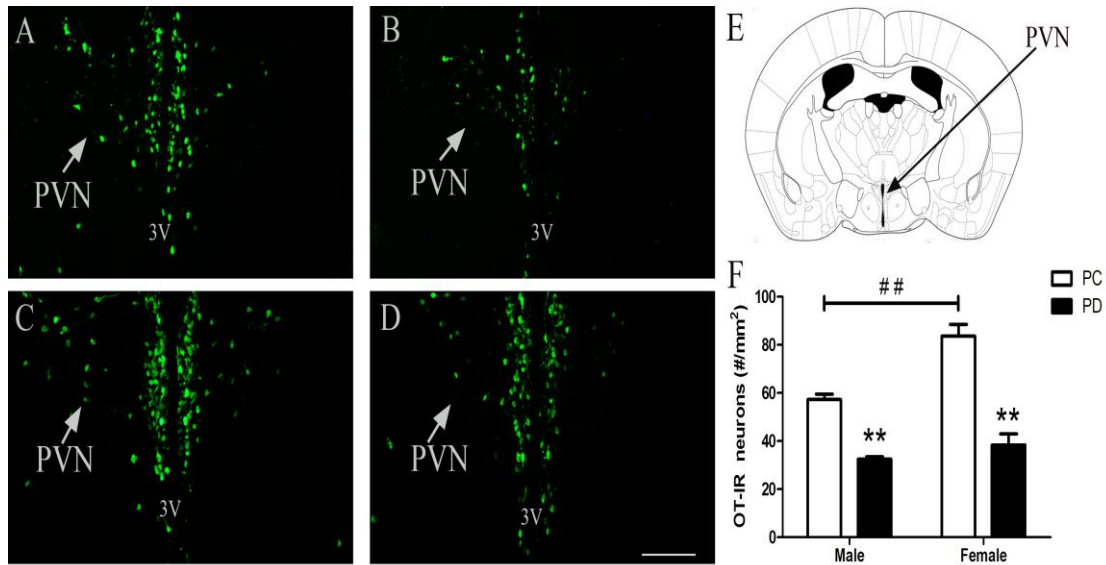

2

3 **Fig 2.** Effect of PD on PVN OT-ir neurons. (A) PC males; (B) PD males; (C) PC females; (D) PD females; magnification 10 x, scale bar 200  $\mu$ m, 3V–3rd ventricle. (E) Schematic drawing illustrating tissue in the PVN. (F) Quantification of OT-IR neurons in the PVN (Male: PC: n = 4, PD: n = 4; Female: PC: n = 4, PD: n = 4). Error bars indicate SEM. \*\*p < 0.01 vs. PC. ## p < 0.01 vs. male. Two-way ANOVA (factors: treatment  $\times$  sex). PVN: paraventricular nucleus.

8

9 **Figure 3**

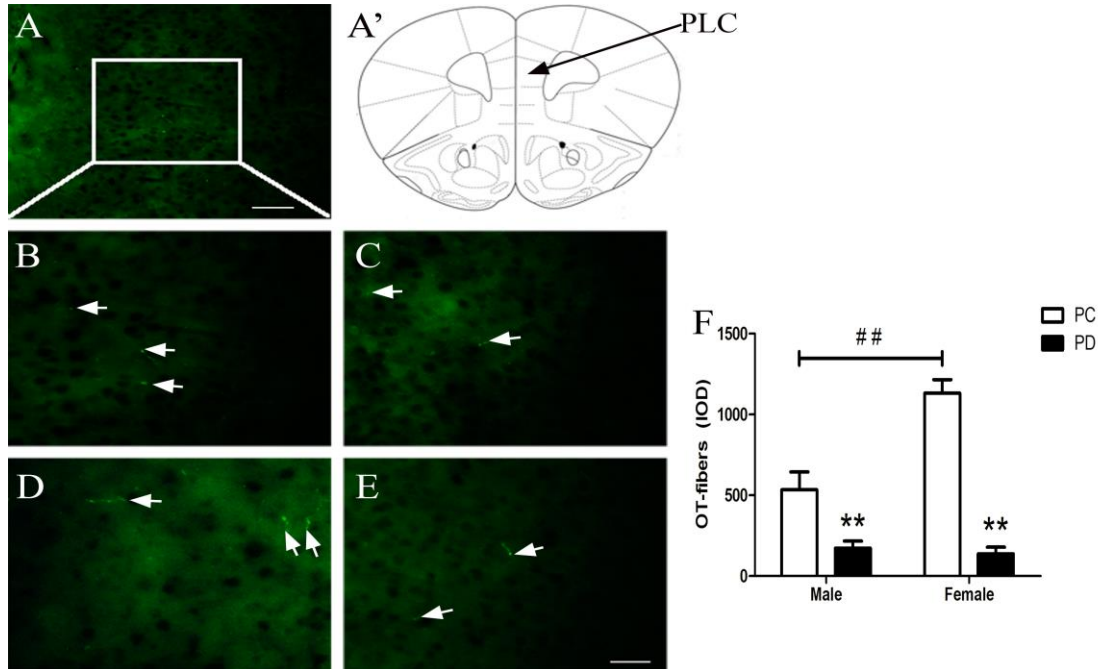

10

11 **Fig 3.** Effect of PD on PLC OT-ir fibers. (A-A') Photomicrograph showing high somatodendritic immunoreactivity of OT in the PLC (magnification 20 x, scale bar 100  $\mu$ m). (B) PC males; (C) PD males; (D) PC females; (E) PD females; magnification 40 x, scale bar 50  $\mu$ m. (F) Quantification of OT-IR fibers in the PLC (Male: PC: n = 4, PD: n = 4; Female: PC: n = 4, PD: n = 4). Error bars indicate the SEM. ## p < 0.01 vs. male. Two-way ANOVA (factors: treatment  $\times$  sex). PLC: prelimbic cortex.

16



1 **Figure 4**

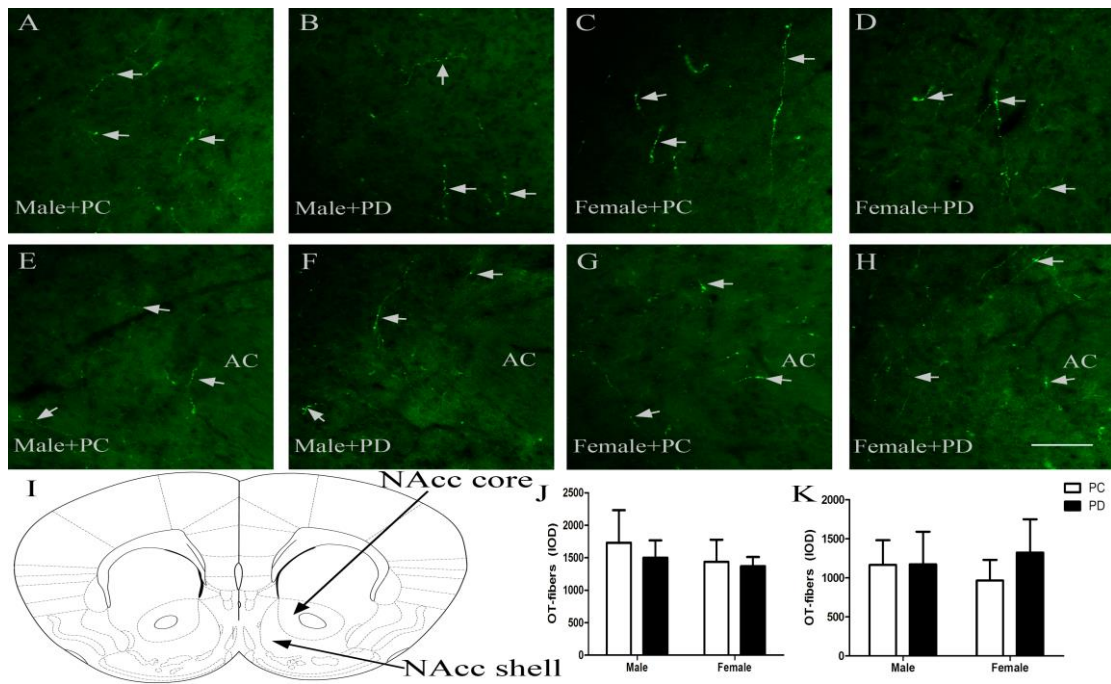

2

3 **Fig 4.** Effect of PD on NAcc OT-IR fibers in males and females. (A-D) NAcc shell; (E-H) NAcc core, AC =  
 4 anterior commissure; magnification 20 x, scale bar 100  $\mu$ m. (I) Schematic drawing illustrating tissue in the NAcc.  
 5 (J-K) Quantification of OT-IR fibers in the NAcc (Male: PC: n = 4, PD: n = 4; Female: PC: n = 4, PD: n = 4).  
 6 Error bars indicate SEM. Two-way ANOVA (factors: treatment × sex). NAcc: nucleus accumbens.

7

8 **Figure 2-4 -supplement 2**

9 **Table 2. Summary of the OT-IR cells or fibers analysis.**

|                                | Nucleus      | Male                 |                      | Female               |                      | Related Figure | Data analysis |
|--------------------------------|--------------|----------------------|----------------------|----------------------|----------------------|----------------|---------------|
|                                |              | PC (n=4)             | PD (n=4)             | PC (n=4)             | PD (n=4)             |                |               |
| Oxytocin-positive neurons      | PVN          | 57.32 $\pm$ 2.25     | 32.45 $\pm$ 0.97     | 83.65 $\pm$ 4.83     | 38.35 $\pm$ 4.60     | Fig. 2A-D, F   |               |
| OT-immunoreactive fibers (IOD) | PLC          | 534.53 $\pm$ 109.79  | 173.56 $\pm$ 43.20   | 1132.01 $\pm$ 84.24  | 137.79 $\pm$ 41.73   | Fig. 3B-F      | Two-way ANOVA |
|                                | NAcc (shell) | 1731.06 $\pm$ 498.14 | 1499.88 $\pm$ 266.49 | 1433.51 $\pm$ 342.95 | 1369.70 $\pm$ 139.05 | Fig. 4A-D, J   |               |
|                                | NAcc (core)  | 1165.56 $\pm$ 317.45 | 1171.78 $\pm$ 418.55 | 965.73 $\pm$ 265.70  | 1323.78 $\pm$ 427.57 | Fig. 4E-H, K   |               |

PC: biparental care; PD: paternal deprivation; PVN: paraventricular nucleus; PLC: prelimbic cortex; NAcc: nucleus accumbens.

10

11

1 **Figure 5**

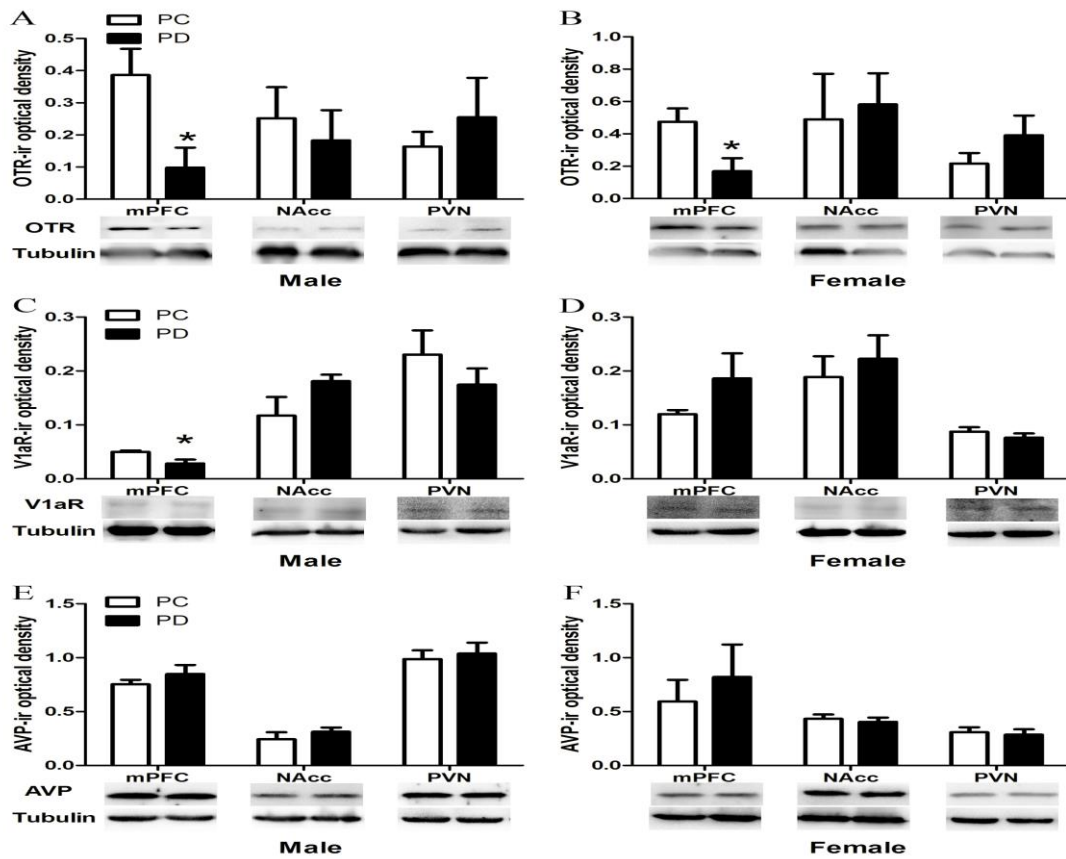

2

3 **Fig 5.** Effects of PD on mesocorticolimbic (A-B) OTR, (C-D) V1aR and (E-F) AVP immunoreactivity in male and  
 4 female mandarin voles (Male: PC: n = 4, PD: n = 4; Female: PC: n = 4, PD: n = 4). Error bars indicate SEM. \* p <  
 5 0.05. Independent sample t-tests. PC: biparental care; PD: paternal deprivation; OTR: oxytocin receptor; V1aR:  
 6 vasopressin 1a receptor; AVP: arginine vasopressin; mPFC: medial prefrontal cortex; NAcc: nucleus accumbens;  
 7 PVN: paraventricular nucleus.

8

9 **Figure 5 -supplement 3**

10 **Table 3. Summary of the expression of OTR, V1aR and AVP proteins analysis.**

|      | Male    |           | Female    |           | Related Figure | Data analysis |
|------|---------|-----------|-----------|-----------|----------------|---------------|
|      | Nucleus | PC (n=4)  | PD (n=4)  | PC (n=4)  |                |               |
| OTR  | mPFC    | 0.39±0.08 | 0.10±0.06 | 0.47±0.08 | 0.17±0.08      | Fig. 5A-B     |
|      | NAcc    | 0.25±0.10 | 0.18±0.10 | 0.49±0.28 | 0.58±0.19      |               |
|      | PVN     | 0.16±0.05 | 0.26±0.12 | 0.22±0.06 | 0.39±0.12      |               |
| V1aR | mPFC    | 0.05±0.00 | 0.03±0.01 | 0.12±0.01 | 0.19±0.05      | Fig. 5C-D     |
|      | NAcc    | 0.12±0.03 | 0.18±0.01 | 0.19±0.04 | 0.22±0.04      |               |
|      | PVN     | 0.23±0.04 | 0.17±0.03 | 0.09±0.01 | 0.07±0.01      |               |
| AVP  | mPFC    | 0.75±0.04 | 0.85±0.08 | 0.59±0.20 | 0.82±0.30      | Fig. 5E-F     |
|      | NAcc    | 0.24±0.06 | 0.31±0.04 | 0.43±0.04 | 0.40±0.04      |               |
|      | PVN     | 0.99±0.08 | 1.04±0.10 | 0.31±0.05 | 0.29±0.05      |               |

PC: biparental care; PD: paternal deprivation; OTR: oxytocin receptor; V1aR: vasopressin 1a receptor; AVP: arginine vasopressin; PVN: paraventricular nucleus; mPFC: medial prefrontal cortex; NAcc: nucleus accumbens.

1 **Figure 6**

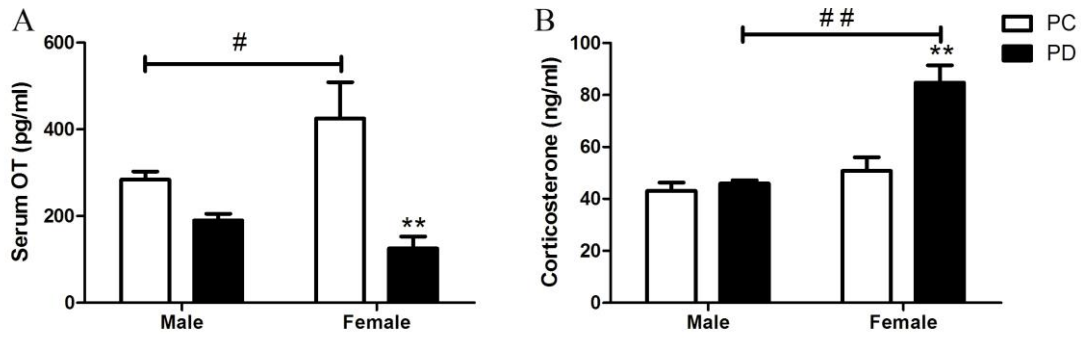

2

3 **Fig 6.** Levels of serum (A) OT and (B) CORT concentrations in adult mandarin voles (Male: PC: n = 6, PD: n = 6;  
 4 Female: PC: n = 6, PD: n = 6). Error bars indicate the SEM. \*\*p < 0.01, PC vs. PD. # p < 0.05, ## p < 0.01, vs.  
 5 male. Two-way ANOVA (factors: treatment × sex). PC: biparental care; PD: paternal deprivation.

6

7 **Figure 6 -supplement 4**

8 **Table 4. Summary of serum oxytocin and corticotropin concentrations analysis.**

|               | Male         |              | Female       |              | Related Figure | Data analysis |
|---------------|--------------|--------------|--------------|--------------|----------------|---------------|
|               | PC (n=6)     | PD (n=6)     | PC (n=6)     | PD (n=6)     |                |               |
| Oxytocin      | 283.54±19.13 | 189.90±15.44 | 424.91±83.92 | 125.12±27.57 | Fig. 6A        | Two-way ANOVA |
| Corticotropin | 43.13±3.15   | 45.97±1.25   | 50.83±5.22   | 84.81±6.61   | Fig. 6B        |               |

9

10

1 **Figure 7**

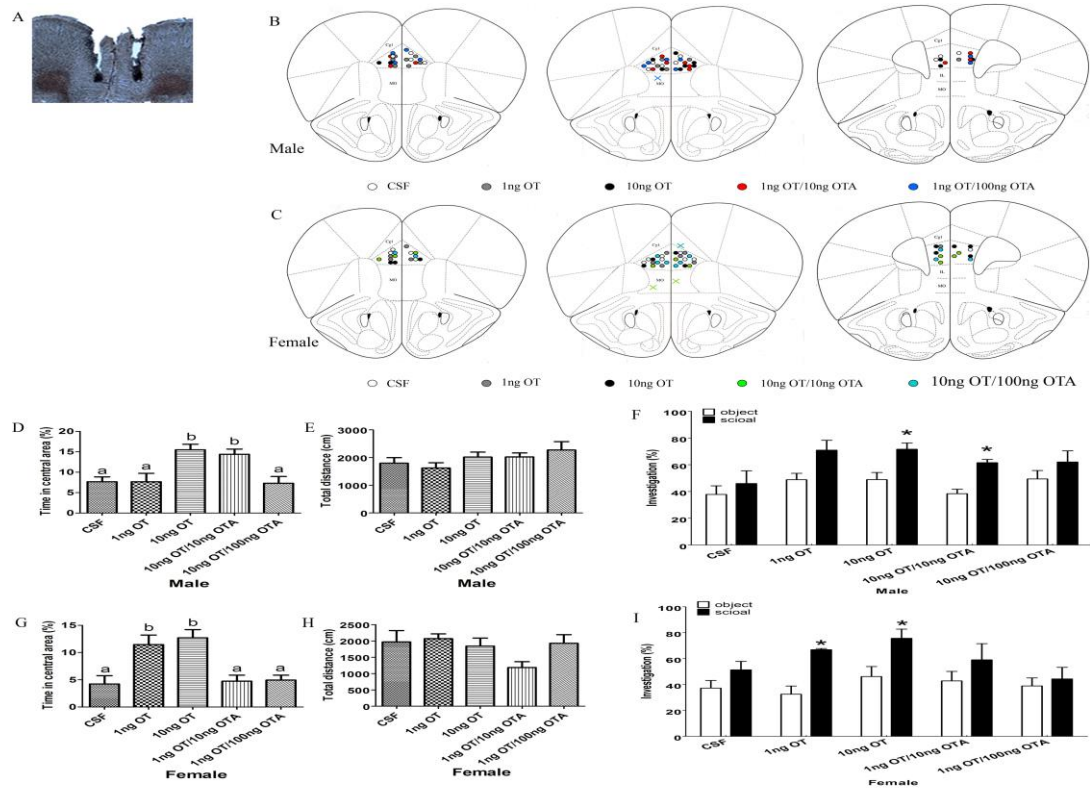

2

3 **Fig 7.** Effects of PLC OT administration on anxiety-like behavior and social preference following the disruption of  
 4 early emotional attachment in adult mandarin voles. (A) Histological representations of microinjection site and (B,  
 5 C) schematic diagrams showing the location of injector tips in the PLC. ×: missed. OT in the PLC is anxiolytic in  
 6 both of sexes. (D, G) Percentage of time in the central area and (E, H) total distance in the open field test (Male:  
 7 CSF: n = 6, 1ng OT: n = 6, 10ng OT: n = 6, 10ng OT /10 ng OTA: n = 6, 10ng OT /100 ng OTA: n = 5; Female:  
 8 CSF: n = 6, 1ng OT: n = 6, 10ng OT: n = 6, 1ng OT /10 ng OTA: n = 5, 1ng OT /100 ng OTA: n = 5). Bars without  
 9 the same letters are significantly different. One-way ANOVA. OT in the PLC promotes a social preference in (F)  
 10 males (CSF: n = 6, 1ng OT: n = 6, 10ng OT: n = 6, 10ng OT /10 ng OTA: n = 6, 10ng OT /100 ng OTA: n = 5) and  
 11 (I) females (CSF: n = 6, 1ng OT: n = 6, 10ng OT: n = 6, 1ng OT /10 ng OTA: n = 5, 1ng OT /100 ng OTA: n = 5).  
 12 \* p < 0.01 vs object stimulus. Two-way ANOVA (factors: treatment × sex).

13

14 **Figure 7 -supplement 5**

15 **Table 5 Summary of microinjection of OT into the PLC on anxiety-like behavior and social**  
 16 **preference analysis.**

|     |                              | Male           |                |                |                        |                         |                |               |
|-----|------------------------------|----------------|----------------|----------------|------------------------|-------------------------|----------------|---------------|
|     |                              | CSF (n=6)      | 1ng OT (n=6)   | 10ng OT (n=6)  | 10ng OT/10ng OTA (n=6) | 10ng OT/100ng OTA (n=5) | Related Figure | Data analysis |
| OFT | Time in the central area (%) | 7.67±1.19      | 7.66±2.10      | 15.49±1.36     | 14.39±1.28             | 7.30±1.65               | Fig. 7D        | One-way ANOVA |
|     | Total distance (cm)          | 1795.86±199.42 | 1620.26±193.76 | 2015.78±180.61 | 2020.92±146.49         | 2273.47±302.81          | Fig. 7E        |               |
| SPT | Object (%)                   | 37.82±6.40     | 48.84±4.74     | 48.86±5.33     | 38.38±3.26             | 49.38±6.28              | Fig. 7F        | Two-way ANOVA |
|     | Social (%)                   | 45.93±9.53     | 70.88±7.39     | 71.56±4.64     | 61.50±2.42             | 62.04±8.32              |                |               |

|     |                              | <b>Female</b>    |                     |                      |                                  |                                   | <b>Related</b> | <b>Data analysis</b> |
|-----|------------------------------|------------------|---------------------|----------------------|----------------------------------|-----------------------------------|----------------|----------------------|
|     |                              | <b>CSF (n=6)</b> | <b>1ng OT (n=6)</b> | <b>10ng OT (n=6)</b> | <b>1ng OT/10ng<br/>OTA (n=5)</b> | <b>1ng OT/100ng<br/>OTA (n=5)</b> | <b>Figure</b>  |                      |
| OFT | Time in the central area (%) | 4.23±1.52        | 11.46±1.76          | 12.71±1.52           | 4.74±1.11                        | 4.94±0.90                         | Fig. 7G        | One-way ANOVA        |
|     | Total distance (cm)          | 1970.14±347.33   | 2070.34±145.21      | 1840.77±245.38       | 1186.91±175.79                   | 1927.52±266.10                    | Fig. 7H        |                      |
| SPT | Object (%)                   | 37.21±5.89       | 32.50±6.36          | 46.13±7.71           | 42.80±7.29                       | 38.92±6.17                        | Fig. 7I        | Two-way ANOVA        |
|     | Social (%)                   | 51.30±6.50       | 66.88±0.89          | 75.64±7.06           | 59.01±12.48                      | 44.28±8.94                        |                |                      |

PC: biparental care; PD: paternal deprivation; CSF: cerebrospinal fluid; OT: oxytocin; OTA: oxytocin receptor antagonist; OFT: Open field test; SPT: Social preference test..
